# Supplementary material for: Unexpected scarcity of ANME Archaea in hydrocarbon seeps within Monterey Bay
Source: Copernicus journal article supplement (doi:10.5194/egusphere-2024-1377), 2024-05-16
Supplement: Supplementary file 2 [file egusphere-2024-1377-supplement.pdf]

Table S1: Monterey Bay sediment core information.

| Site Name       | Core Type | Dive Number | Core Number | Latitude; Longitude | Water Depth (m) | Sediment Horizons Sampled (cmbsf)       | Substrate Type       |
|-----------------|-----------|-------------|-------------|---------------------|-----------------|-----------------------------------------|----------------------|
| Clam Field      | Seep      | DR1139      | PC 75       | 36.7356; -122.0342  | 895             | 0-2.5, 2.5-5, 5-7.5, 7.5-10, 10-15, 15+ | Patchy microbial mat |
| Clam Field      | Seep-Edge | DR1139      | PC 71       | 36.7356; -122.0342  | 895             | 0-2.5, 2.5-5, 5-7.5, 7.5-10, 10-15, 15+ | Patchy microbial mat |
| Clam Field      | Bkgd-5m   | DR1139      | PC 56       | 36.7356; -122.0342  | 895             | 0-2.5, 2.5-5, 5-7.5, 7.5-10, 10-15, 15+ | Sand                 |
| Clam Field      | Bkgd-100m | DR1139      | PC 66       | 36.7365; -122.0342  | 908             | 0-2.5, 2.5-5, 5-7.5, 7.5-10, 10-15, 15+ | Sand                 |
| Extrovert Cliff | Seep      | DR1140      | PC 64       | 36.7765; -122.0850  | 965             | 0-2.5, 2.5-5, 5-7.5, 7.5-10, 10-15      | Thick microbial mat  |
| Extrovert Cliff | Seep-Edge | DR1140      | PC 44       | 36.7765; -122.0850  | 965             | 0-2.5, 2.5-5, 5-7.5, 7.5-10             | Thick microbial mat  |
| Extrovert Cliff | Bkgd-5m   | DR1140      | PC 79       | 36.7765; -122.0851  | 965             | 0-2.5, 2.5-5, 5-7.5, 7.5-10, 10-15, 15+ | Sand                 |
| Extrovert Cliff | Bkgd-100m | DR1140      | PC 63       | 36.7759; -122.0844  | 990             | 0-2.5, 2.5-5, 5-7.5, 7.5-10, 10-15, 15+ | Sand                 |

Table S2: Incubation scheme for Clam Field sediments. Five treatments with varying concentrations of methane (with a 20% <sup>13</sup>C label) were performed in triplicate on sediment from each horizon.

| Desired Methane Partial Pressure (atm) | AMENDMENTS                                             |                                                        |                                |                                                                         |
|----------------------------------------|--------------------------------------------------------|--------------------------------------------------------|--------------------------------|-------------------------------------------------------------------------|
|                                        | <sup>13</sup> CH <sub>4</sub> Volume in Headspace (mL) | <sup>12</sup> CH <sub>4</sub> Volume in Headspace (mL) | Argon Volume in Headspace (mL) | <sup>15</sup> NH <sub>4</sub> <sup>+</sup> Concentration in Slurry (μM) |
| 0                                      | 0                                                      | 0                                                      | 80                             | 100                                                                     |
| 0.25                                   | 2                                                      | 8                                                      | 70                             | 100                                                                     |
| 0.5                                    | 4                                                      | 16                                                     | 60                             | 100                                                                     |
| 1                                      | 8                                                      | 32                                                     | 40                             | 100                                                                     |
| 2                                      | 16                                                     | 64                                                     | 0                              | 100                                                                     |

Table S3: Gene targeting regions of primers used in this study.

| Primer Name | Target Gene | Sequence (5' - 3')    | Reference                                                |
|-------------|-------------|-----------------------|----------------------------------------------------------|
| 515F-Y      | 16S rRNA    | GTGYCAGCMGCCGCGGTAA   | Parada et al. 2016                                       |
| 926R        | 16S rRNA    | CCGYCAATTYMTTTRAGTTT  | Parada et al. 2016                                       |
| mcrA_F      | <i>mcrA</i> | GGTGGTGTMGGATTCACACAR | shortened from Luton et al. 2002 as in Dekas et al. 2016 |
| mcrA_R      | <i>mcrA</i> | TTCATTGCRTAGTTWGGRTAG | shortened from Luton et al. 2002 as in Dekas et al. 2016 |

Table S4: Amplification of 16S rRNA and *mcrA* genes and transcripts in Monterey Bay samples with primer sets 515F-Y / 926R (Parada et al., 2016) and *mcrA*\_F / *mcrA*\_R (shortened from Luton et al. (2002) as in Dekas et al. (2016)). Grey filled boxes indicate that amplification was observed in that extract with the given primer set.

| Sample ID                 | 515F-Y / 926R |      | <i>mcrA</i> _F / <i>mcrA</i> _R |      |
|---------------------------|---------------|------|---------------------------------|------|
|                           | DNA           | cDNA | DNA                             | cDNA |
| CF_Seep_C75_0-2.5cm       |               |      |                                 |      |
| CF_Seep_C75_2.5-5cm       |               |      |                                 |      |
| CF_Seep_C75_5-7.5cm       |               |      |                                 |      |
| CF_Seep_C75_7.5-10cm      |               |      |                                 |      |
| CF_Seep_C75_10-15cm       |               |      |                                 |      |
| CF_Seep_C75_15+cm         |               |      |                                 |      |
| CF_Seep-Edge_C71_0-2.5cm  |               |      |                                 |      |
| CF_Seep-Edge_C71_2.5-5cm  |               |      |                                 |      |
| CF_Seep-Edge_C71_5-7.5cm  |               |      |                                 |      |
| CF_Seep-Edge_C71_7.5-10cm |               |      |                                 |      |
| CF_Seep-Edge_C71_10-15cm  |               |      |                                 |      |
| CF_Seep-Edge_C71_15+cm    |               |      |                                 |      |
| CF_Bkgd-5m_C56_0-2.5cm    |               |      |                                 |      |
| CF_Bkgd-5m_C56_2.5-5cm    |               |      |                                 |      |
| CF_Bkgd-5m_C56_5-7.5cm    |               |      |                                 |      |
| CF_Bkgd-5m_C56_7.5-10cm   |               |      |                                 |      |
| CF_Bkgd-5m_C56_10-15cm    |               |      |                                 |      |
| CF_Bkgd-5m_C56_15+cm      |               |      |                                 |      |
| CF_Bkgd-100m_C66_0-2.5cm  |               |      |                                 |      |
| CF_Bkgd-100m_C66_2.5-5cm  |               |      |                                 |      |
| CF_Bkgd-100m_C66_5-7.5cm  |               |      |                                 |      |
| CF_Bkgd-100m_C66_7.5-10cm |               |      |                                 |      |

|                           |  |  |  |  |
|---------------------------|--|--|--|--|
| CF_Bkgd-100m_C66_10-15cm  |  |  |  |  |
| CF_Bkgd-100m_C66_15+cm    |  |  |  |  |
| EC_Seep_C64_0-2.5cm       |  |  |  |  |
| EC_Seep_C64_2.5-5cm       |  |  |  |  |
| EC_Seep_C64_5-7.5cm       |  |  |  |  |
| EC_Seep_C64_7.5-10cm      |  |  |  |  |
| EC_Seep_C64_10-15cm       |  |  |  |  |
| EC_Seep-Edge_C44_0-2.5cm  |  |  |  |  |
| EC_Seep-Edge_C44_2.5-5cm  |  |  |  |  |
| EC_Seep-Edge_C44_5-7.5cm  |  |  |  |  |
| EC_Seep-Edge_C44_7.5-10cm |  |  |  |  |
| EC_Bkgd-5m_C79_0-2.5cm    |  |  |  |  |
| EC_Bkgd-5m_C79_2.5-5cm    |  |  |  |  |
| EC_Bkgd-5m_C79_5-7.5cm    |  |  |  |  |
| EC_Bkgd-5m_C79_7.5-10cm   |  |  |  |  |
| EC_Bkgd-5m_C79_10-15cm    |  |  |  |  |
| EC_Bkgd-5m_C79_15+cm      |  |  |  |  |
| EC_Bkgd-100m_C63_0-2.5cm  |  |  |  |  |
| EC_Bkgd-100m_C63_2.5-5cm  |  |  |  |  |
| EC_Bkgd-100m_C63_5-7.5cm  |  |  |  |  |
| EC_Bkgd-100m_C63_7.5-10cm |  |  |  |  |
| EC_Bkgd-100m_C63_10-15cm  |  |  |  |  |
| EC_Bkgd-100m_C63_15+cm    |  |  |  |  |

Table S5: Estimated ANME *mcrA* gene copy numbers, based on total *mcrA* gene copy numbers and ANME relative abundance in *mcrA* sequencing data.

| Site Name       | Core Type | Sediment Depth (cmbfsf) | ANME <i>mcrA</i> Relative Abundance | <i>mcrA</i> Copies (g <sup>-1</sup> Dry Sediment) | ANME <i>mcrA</i> Copies (g <sup>-1</sup> Dry Sediment) |
|-----------------|-----------|-------------------------|-------------------------------------|---------------------------------------------------|--------------------------------------------------------|
| Clam Field      | Seep      | 0-2.5                   | 0.54                                | 4.15E+06                                          | 2.25E+06                                               |
| Clam Field      | Seep      | 2.5-5                   | 0.56                                | 3.46E+06                                          | 1.94E+06                                               |
| Clam Field      | Seep      | 5-7.5                   | 0.20                                | 2.22E+05                                          | 4.50E+04                                               |
| Clam Field      | Seep      | 7.5-10                  | 0.31                                | 2.53E+06                                          | 7.87E+05                                               |
| Clam Field      | Seep      | 10-15                   | 2.63                                | 4.07E+05                                          | 1.07E+06                                               |
| Clam Field      | Seep      | 15+                     | 20.23                               | 4.07E+05                                          | 8.23E+06                                               |
| Extrovert Cliff | Seep      | 0-2.5                   | 74.16                               | 2.10E+07                                          | 1.56E+09                                               |
| Extrovert Cliff | Seep      | 2.5-5                   | 87.64                               | 5.32E+07                                          | 4.67E+09                                               |
| Extrovert Cliff | Seep      | 5-7.5                   | 95.10                               | 2.73E+07                                          | 2.60E+09                                               |
| Extrovert Cliff | Seep      | 7.5-10                  | 94.10                               | 1.50E+07                                          | 1.41E+09                                               |
| Extrovert Cliff | Seep      | 10-15                   | 54.45                               | 1.50E+07                                          | 8.17E+08                                               |
| Clam Field      | Bkgd-5m   | 0-2.5                   | 22.90                               | 7.30E+05                                          | 1.67E+07                                               |
| Clam Field      | Bkgd-5m   | 2.5-5                   | 16.00                               | 3.96E+05                                          | 6.33E+06                                               |
| Clam Field      | Bkgd-5m   | 5-7.5                   | 11.69                               | 5.88E+05                                          | 6.87E+06                                               |
| Clam Field      | Bkgd-5m   | 7.5-10                  | 9.63                                | 5.80E+05                                          | 5.59E+06                                               |
| Clam Field      | Bkgd-5m   | 10-15                   | 41.75                               | 1.09E+06                                          | 4.57E+07                                               |
| Clam Field      | Bkgd-5m   | 15+                     | 51.30                               | 1.34E+06                                          | 6.87E+07                                               |
| Extrovert Cliff | Bkgd-5m   | 0-2.5                   | 8.99                                | 6.28E+05                                          | 5.65E+06                                               |
| Extrovert Cliff | Bkgd-5m   | 2.5-5                   | 9.23                                | 8.45E+05                                          | 7.80E+06                                               |
| Extrovert Cliff | Bkgd-5m   | 5-7.5                   | 7.14                                | 6.43E+05                                          | 4.59E+06                                               |
| Extrovert Cliff | Bkgd-5m   | 7.5-10                  | 2.60                                | 3.19E+05                                          | 8.30E+05                                               |
| Extrovert Cliff | Bkgd-5m   | 10-15                   | 1.00                                | 1.12E+06                                          | 1.11E+06                                               |
| Extrovert Cliff | Bkgd-5m   | 15+                     | 15.35                               | 4.70E+05                                          | 7.21E+06                                               |

Table S6: Methane diffusive flux calculations.

| Site Name  | Core Type | Average Sediment Porosity | Ds (m <sup>2</sup> /yr) | Methane Conc. Gradient (μM / cm) | Methane Conc. Gradient (mmol m <sup>-3</sup> m <sup>-1</sup> ) | Flux (mmol m <sup>-4</sup> yr <sup>-1</sup> ) |
|------------|-----------|---------------------------|-------------------------|----------------------------------|----------------------------------------------------------------|-----------------------------------------------|
| Clam Field | Seep      | 0.771                     | 2.62E-02                | 8.79                             | 8.79E+02                                                       | -17.7                                         |
| Clam Field | Seep-Edge | 0.774                     | 2.63E-02                | 9.09                             | 9.09E+02                                                       | -18.5                                         |

Table S7: Taxonomic affiliations of the 20 most abundant 16S rRNA ASVs (cDNA) in Clam Field seep sediment (> 2.5 cmbsf) according to SILVA release 138 (Quast et al., 2013), and the average potential relative activity across samples (%).

|           | <b>ASV</b> | <b>Phylum</b>     | <b>Specific Taxonomic Group</b>    | <b>Clam Field Seep Average Relative Potential Relative Activity (%)</b> |
|-----------|------------|-------------------|------------------------------------|-------------------------------------------------------------------------|
| <b>1</b>  | ASV.7      | Desulfobacterota  | Desulfatiglans                     | 13.76                                                                   |
| <b>2</b>  | ASV.33     | Bacteroidota      | Bacteroidetes BD2-2                | 9.51                                                                    |
| <b>3</b>  | ASV.396    | Chloroflexi       | SCGC-AB-539-J10                    | 8.29                                                                    |
| <b>4</b>  | ASV.16     | Bacteroidota      | Draconibacterium                   | 7.84                                                                    |
| <b>5</b>  | ASV.39     | Verrucomicrobiota | R76-B128                           | 7.49                                                                    |
| <b>6</b>  | ASV.215    | Desulfobacterota  | Desulfatiglans                     | 5.96                                                                    |
| <b>7</b>  | ASV.379    | Acetothermia      | Acetothermia                       | 5.39                                                                    |
| <b>8</b>  | ASV.50     | Chloroflexi       | Thermomarinilinea                  | 5.12                                                                    |
| <b>9</b>  | ASV.146    | Bacteroidota      | Labilibacter                       | 4.95                                                                    |
| <b>10</b> | ASV.281    | TA06              | TA06                               | 4.50                                                                    |
| <b>11</b> | ASV.70     | Thermoplasmatota  | Marine Benthic Group D and DHVEG-1 | 4.29                                                                    |
| <b>12</b> | ASV.60     | Verrucomicrobiota | R76-B128                           | 4.27                                                                    |
| <b>13</b> | ASV.478    | Desulfobacterota  | Desulfobacterales                  | 4.18                                                                    |
| <b>14</b> | ASV.31     | Bacteroidota      | Bacteroidetes BD2-2                | 3.65                                                                    |
| <b>15</b> | ASV.3      | Desulfobacterota  | Desulfobacteraceae                 | 3.61                                                                    |
| <b>16</b> | ASV.2      | Campylobacterota  | Sulfurovum                         | 3.57                                                                    |
| <b>17</b> | ASV.5      | Desulfobacterota  | SEEP-SRB4                          | 3.45                                                                    |
| <b>18</b> | ASV.489    | Chloroflexi       | AB-539-J10                         | 3.40                                                                    |
| <b>19</b> | ASV.20     | Proteobacteria    | endosymbionts                      | 3.34                                                                    |
| <b>20</b> | ASV.120    | Verrucomicrobiota | MSBL3                              | 3.32                                                                    |

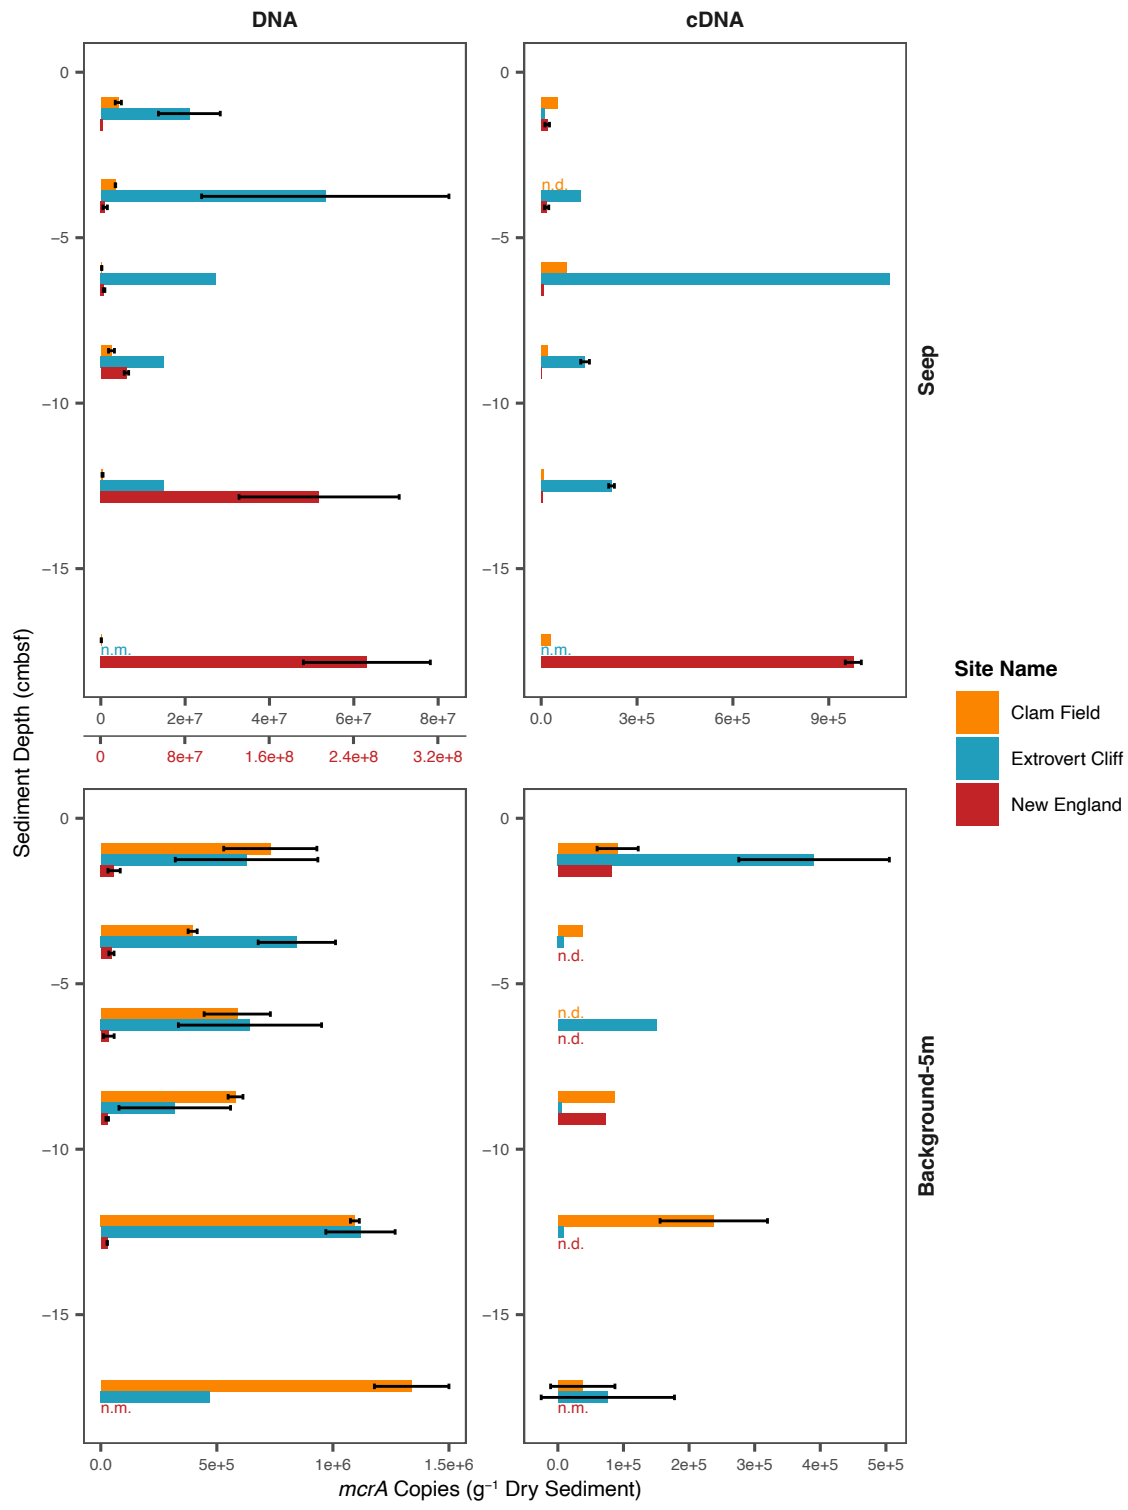

Supplementary Fig. S1: Comparison of *mcrA* gene (DNA; left) and transcript (cDNA; right) abundance with sediment depth in Monterey Bay (Clam Field and Extrovert Cliff sites) and the US Atlantic Margin (New England seep). Data are from within seep (top) and background sediment (5 meters outside seep; bottom). Values with error bars are

the means of two technical replicates; error bars represent the standard deviation. (Note that *mcrA* gene concentrations in New England seep sediments are an order of magnitude higher than they appear and are measured on an alternative x-axis in red.)

n.d. – *mcrA* ddPCR assay conducted, but *mcrA* not detected

n.m. – not measured (assay not conducted)

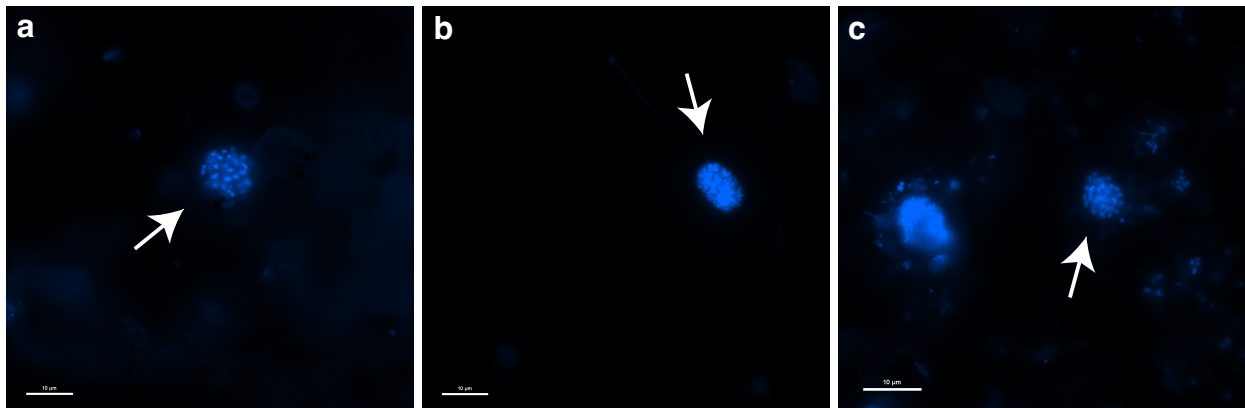

Supplementary Fig. S2: Aggregates of putative ANME archaea from seeps at Extrovert Cliff (a), as well as from Shallop Canyon East (b) and New England Seep (c) (examined as positive controls), visualized with a DAPI stain. No aggregates were recovered from Clam Field. Scale bar is 10  $\mu\text{m}$ .

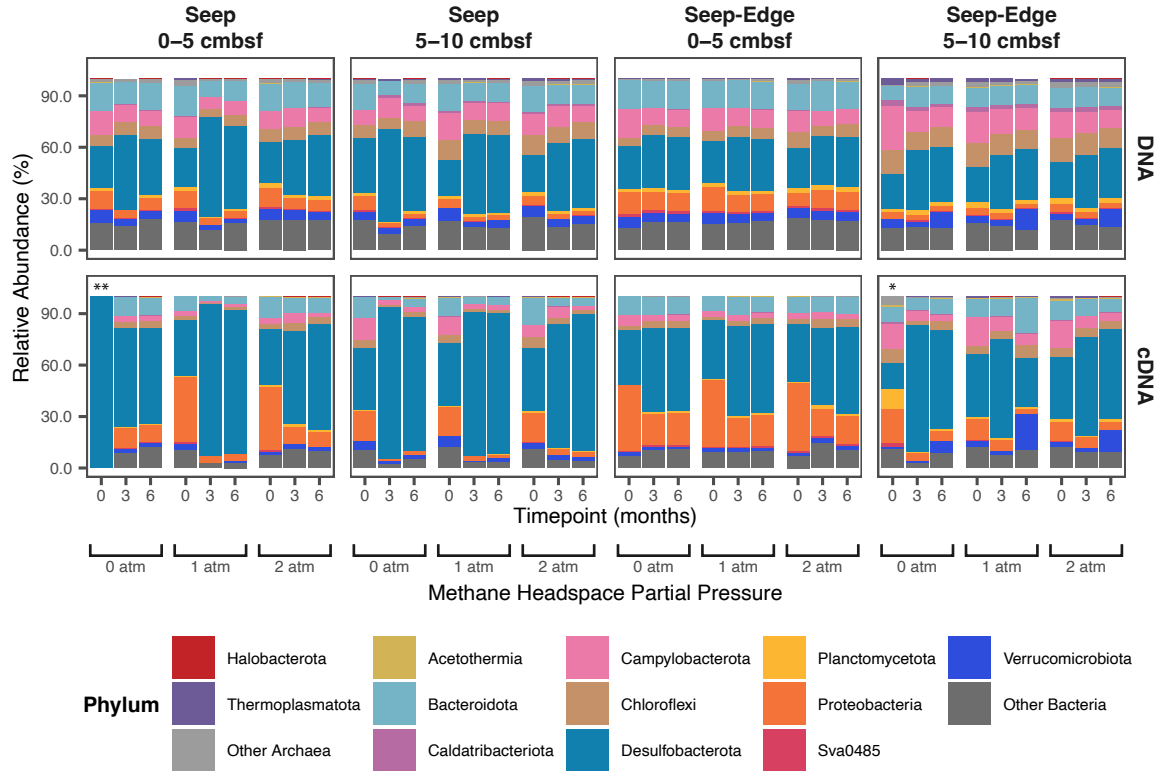

Supplementary Fig. S3: Relative abundance (%) of Archaea and Bacteria phyla with time in Clam Field seep incubations, as inferred by 16S rRNA gene (DNA) and 16S rRNA (cDNA) sequencing. Sediment from four separate sediment horizons (sediment source delineated by each box) was incubated under three methane headspace treatments – ranging from 0 to 2 atm methane. Each of the twelve incubations was sampled at 0-, 3-, and 6-month timepoints.

\*Sample contains fewer than 1,000 or \*\*25 reads.



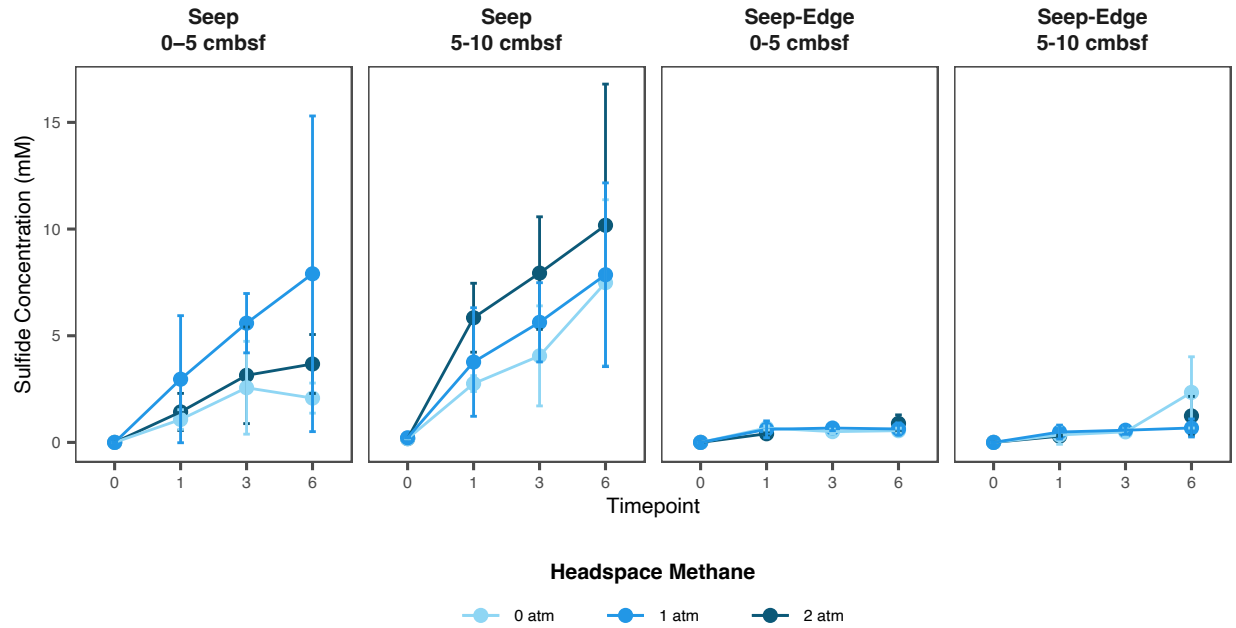

Supplementary Fig. S4: Sulfide concentrations with time in incubations of Clam Field seep sediment. Sediment from four separate sediment horizons (sediment source delineated by each box) was incubated under three methane headspace treatments – ranging from 0 to 2 atm methane – and sampled at 0-, 1-, 3-, and 6-month timepoints. Error bars represent the standard deviation of the mean of three biological replicates.

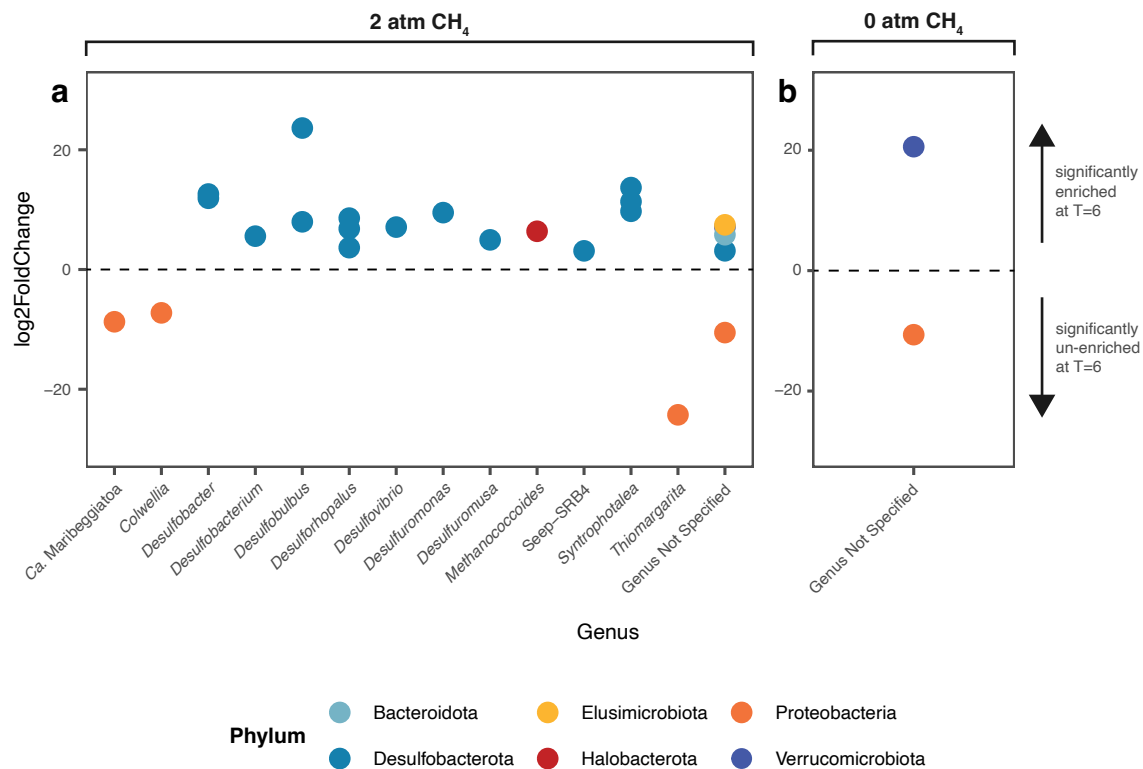

Supplementary Fig. S5: ASVs which were significantly over-enriched or under-enriched in incubations at the 6-month timepoint vs 0-month under a methane headspace of 2 atm (A) or 0 atm (B). Taxa with a positive log<sub>2</sub>fold change were significantly over-enriched at 6 months, while taxa with a negative change were significantly under-enriched.

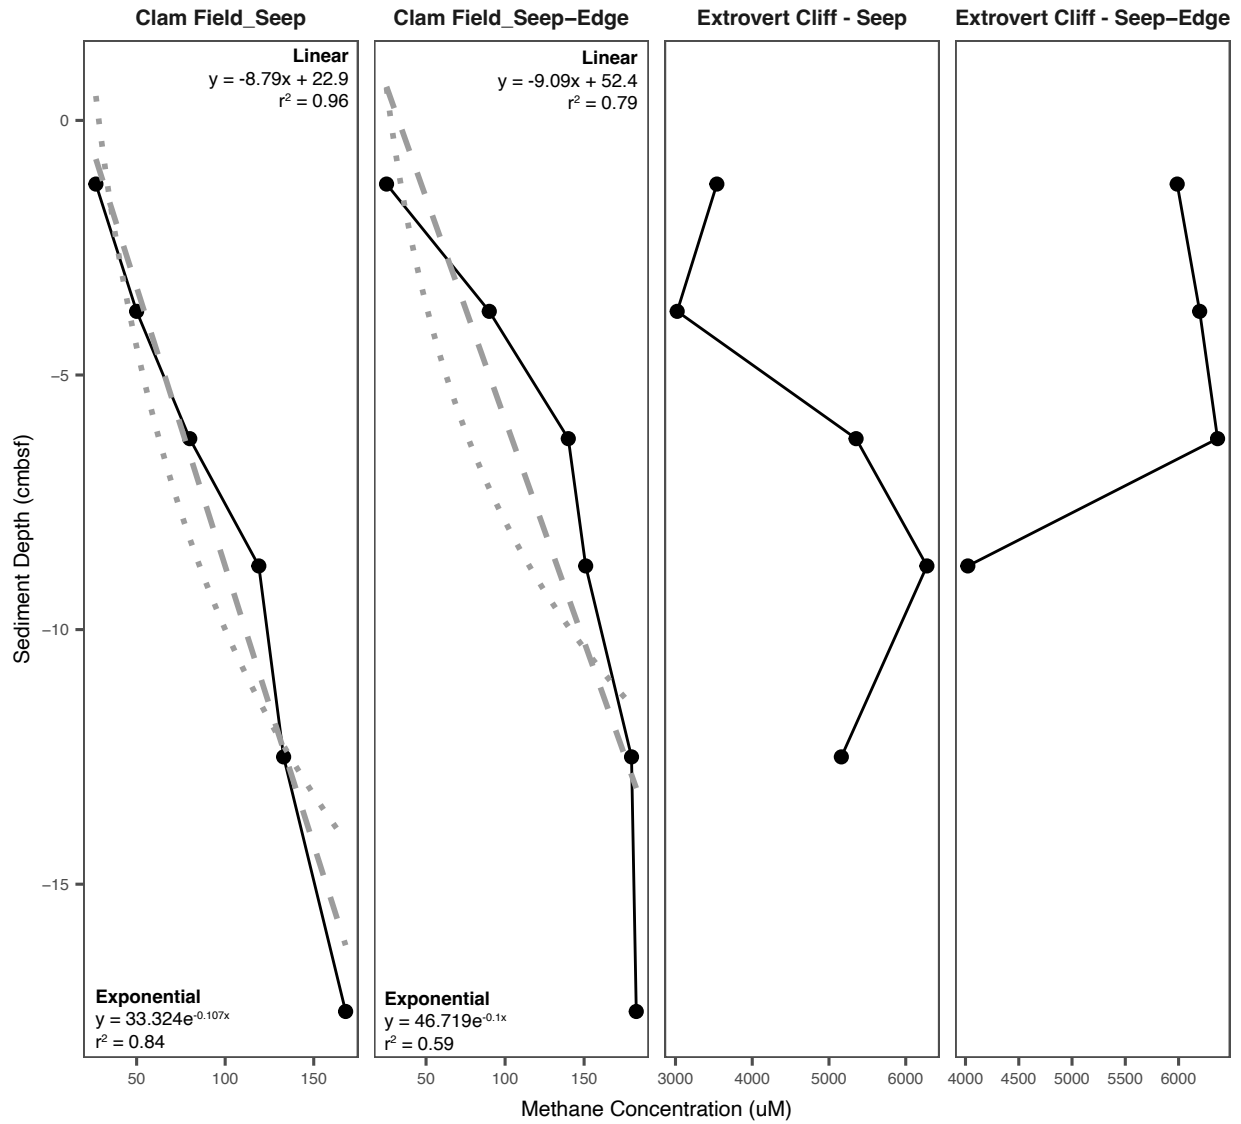

Supplementary Fig. S6: Methane concentrations with depth in seep cores from Clam Field and Extrovert Cliff. The fit of linear (dashed line) and exponential (dotted line) models are evaluated at Clam Field; linear model slopes (quantifying methane concentration with sediment depth) were used to calculate diffusive methane flux.
