# Supplementary material for: Unexpected scarcity of ANME Archaea in hydrocarbon seeps within Monterey Bay
Source: Copernicus journal article supplement (doi:10.5194/egusphere-2024-1377), 2024-05-16
Supplement: Supplementary file [file egusphere-2024-1377-AC2-supplement.pdf]

The manuscript by Semler & Dekas describes the biochemistry and microbial ecology of two cold seep sites located in the Monterey Bay area. The authors report low abundances of ANME archaea quantified by 16S rRNA gene and transcript sequencing, together with ddPCR and mcrA sequencing, complemented by microscopic identification of typical ANME-SRB aggregates, low rates of potential activity and lack of response to the presence of methane during prolonged incubations. These microbial ecology observations are complemented by geochemical measurements of relevant compounds (methane, sulfide, sulfate) and isotopic measurements of methane.

The manuscript is well written and tackles an interesting question. The data seem to be carefully collected and are described and analyzed with scientific rigor. Conclusions follow environmental observations or experimental outcomes and hypotheses are presented as such in case they could not be confirmed by experimentation/observation. My comments are all minor. I congratulate the authors for this very interesting piece of work

We appreciate this referee's positive comments about the overall craftsmanship, and we are happy to address their revisions and concerns in another draft. Our direct responses to overall and line-by-line comments are below in blue, with proposed textual additions in green.

While the DAPI staining nicely shows aggregates of cells at Extrovert Cliff, their taxonomic identity is unclear. The authors are aware of this (L399) and describe them as putative ANME aggregates (Fig S2 caption) and claim that an ANME-typical morphology was detected (L508). Would it be possible to explain this in the discussion? Is this morphology really typical? Is there any previous experience with such an indirect classification? This would help the reader to see the validity of the experimental strategy.

Yes, there is some precedent for this kind of indirect classification, and we will add the following sentences to the results section to explain our thinking: "ANME-2 and ANME-3 typically form tight associations with their syntrophic partners, resulting in cellular aggregates of characteristic morphologies (Boetius et al., 2001; Orphan et al., 2022). While not a taxa-specific assay, quantifying DAPI-stained cell aggregates typical of the ANME-SRB morphology provides independent support for the presence or absence of aggregate-forming ANME-2 and ANME-3 archaea in the molecular data, and has been used previously to approximate potential ANME-SRB aggregate abundances (Dekas et al., 2009; Zhang et al., 2011)."

My second comment relates to the extended incubation. I wonder why only the Clam Field site was chosen for incubation, even though AOM for the other site was more likely but still low compared to other cold seep sites. I suggest stating the reason in one

sentence. Direct observation/quantification of sulphate-dependent AOM at Extrovert Cliff would allow comparison with other sites.

We set up incubations from Clam Field immediately after the sampling trip – before performing any sequencing on either site. It was chosen mainly based on the surface expression of the seep (patchy mats and clams), the sulfidic smell of sediments, and its similarity to others that had been sampled previously. We hadn't anticipated the absence of ANME at either site. We will add the following sentence to our "Incubation setup" section in the methods to address this comment: "Clam Field was chosen for incubations because its surface expression was similar to that of seeps sampled and characterized in previous studies (McVeigh et al., 2018; Seabrook et al., 2018; Semler et al., 2022), and thus responses of characteristic seep microbial communities to varying methane headspace concentration could be tested."

Minor comments:

L19 - I feel that the last sentence of an abstract needs polishing.

The current text reads: "Our findings highlight the potential for hydrocarbon seeps without this critical biofilter, with implications for their contribution to global methane emissions." We suggest the following change: "Our findings highlight the potential for hydrocarbon seeps without this critical biofilter, and therefore unabated methane emission."

L56 – please consider to include the new clade names for (doi: 10.1371/journal.pbio.3001508.)

We will introduce these new clade names in the introduction at L56 – thank you for the suggestion!

L58 and elsewhere – you use 'symbiont' for the ANME-SRB aggregates while I find 'syntrophs' much more fitting, as it describes the type of metabolic interaction

We will make this word substitution throughout the manuscript.

L183 - Was it possible to overlap majority of pair-end reads after trimming? What was the length of overlap in DADA2 pipeline?

Yes, the majority of 16S rRNA paired-ends were merged. The following sentence will be added to the methods section: "The majority of paired-ends were merged for both genes (an average of 76% for 16S rRNA reads in non-incubated samples and 95% of *mcrA* reads), and the overlap length was roughly 30 bp for 16S rRNA and 50 bp for *mcrA*."

L188 - 53K *mcrA* reads per sample are not in line with 39K reads reported in the Results (L352), please check.

Thank you for noticing this – one value referred to *mcrA* genes AND transcripts, while the other value referred to genes only (and one of the values was mistakenly

calculated). We will make the distinction clearer in both sections and will ensure the values are correct.

L195 - Please specify the substitution model which was used to construct the reference tree.

The substitution method was GTR+G+I. This will be added to the methods section.

L393 - Converting *mcrA* copy number per well to cells per g assumes *mcrA* gene to be a single copy gene which is not true in 100% cases, cell numbers can be overestimated. This is a great point that we can address in a second draft of this manuscript. Happily, most methanogens (and all ANME that have available genomes) appear to have only one or two copies of *mcrA*. We therefore propose the following textual addition: “The assumption of one *mcrA* copy per cell is imperfect, but only one or two copies of *mcrA* have been found in sequenced methanogen genomes (Alvarado et al., 2014), including that of *Methanosarcina mazei* – a close relative of ANME-2 (Deppenmeier et al., 2002; Nunoura et al., 2009). The ANME-1 genome also contains a single operon for MCR (Krukenberg et al., 2018; Chadwick et al., 2022; Laso-Pérez et al., 2023). As a result, the roughly 4 order of magnitude difference in ANME cell numbers between Clam Field and Extrovert Cliff would not be significantly affected by likely variation in ANME *mcrA* copy number.”

L289 and elsewhere – please use 16S rRNA gene amplification rather than 16S rRNA amplification

Thank you for pointing this out. We will change the section title to: “Community composition at Monterey Bay cold seeps via 16S rRNA gene and 16S rRNA amplicon sequencing”, and we will specify 16S rRNA gene and 16S rRNA on L290 as well.

L306 -as inferred by the presence of...

Will be corrected in a future draft.

L429 - Methods section is missing the description of combining ASV matrices from the current and previous studies, please add such description.

16S rRNA gene and 16S rRNA samples from all sites (Monterey Bay and USAM) were actually processed together – the raw USAM data was processed with the raw Monterey Bay data before analysis – and thus have the same ASV matrices. We will put the following sentence in the methods section 2.8: “Raw data from four U.S. Atlantic Margin (USAM) seep sites (characterized in Semler et al. 2022) was simultaneously processed using the same packages for comparison with Monterey Bay sites.”

L605 - ENA accession number is still private, please either release the dataset or share a reviewer's link.

The data should now be released at the accession numbers we specified in Section 6. (There may be a delay until 9/28.)
